# Supplementary material for: Serum- and glucocorticoid- inducible kinase 2, SGK2, is a novel autophagy regulator and modulates platinum drugs response in cancer cells
Source: PubMed Central journal article supplement (PMC7529585; doi:10.1038/s41388-020-01433-6), 2020-08-27
Supplement: 41388_2020_1433_MOESM4_ESM.pdf [file 41388_2020_1433_MOESM4_ESM.pdf]

**Fig. S1 (related to Fig. 1)****a**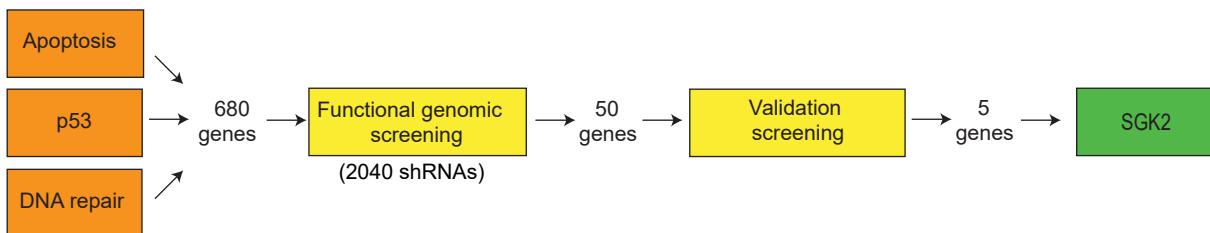**b**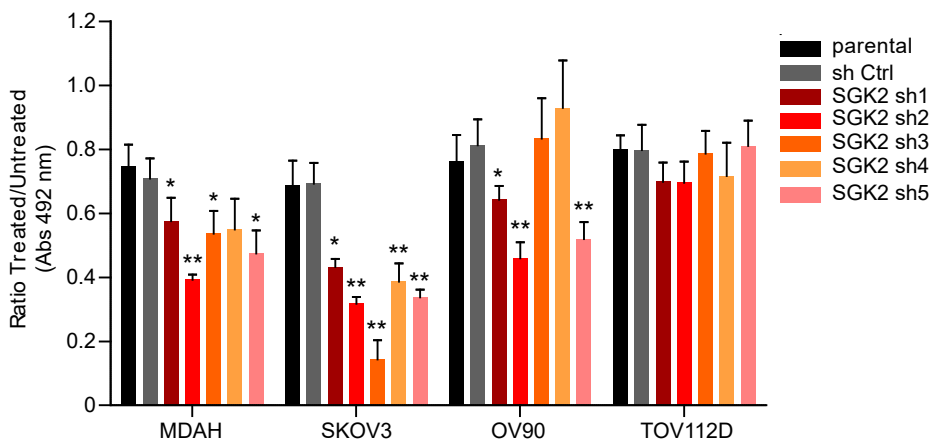**c**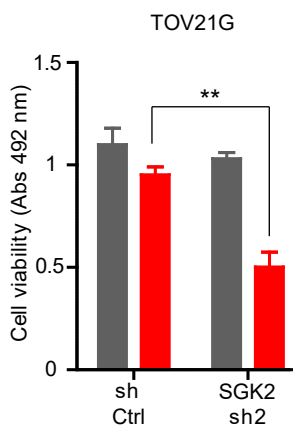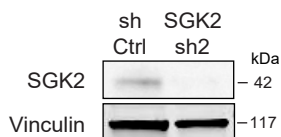**d**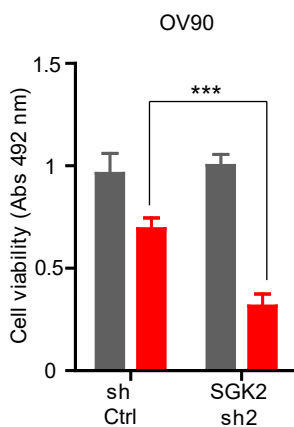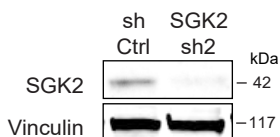**e**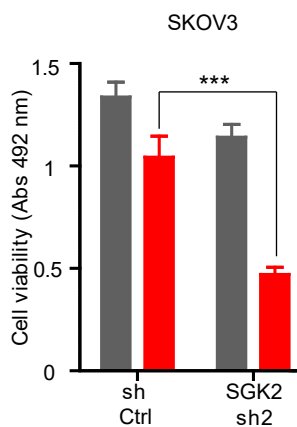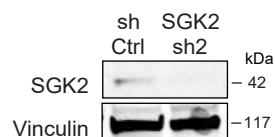

Legend for c, d, e:  
 Grey bar: Untreated  
 Red bar: CBDCA
