# Supplementary material for: Serum- and glucocorticoid- inducible kinase 2, SGK2, is a novel autophagy regulator and modulates platinum drugs response in cancer cells
Source: PubMed Central journal article supplement (PMC7529585; doi:10.1038/s41388-020-01433-6), 2020-08-27
Supplement: 41388_2020_1433_MOESM7_ESM.pdf [file 41388_2020_1433_MOESM7_ESM.pdf]

**Fig. S4 (related to Fig. 3)**

| <b>Number</b> | <b>Tumour</b>      | <b>Histotype</b> | <b>Grade</b> | <b>CT/Neoadjuvant</b> | <b>TNM</b> |
|---------------|--------------------|------------------|--------------|-----------------------|------------|
| 49d           | Primary            | Clear Cell       | G3           | -                     | pT2bN0     |
| 66            | Recurrence ascites | Serous           | n.a.         | -                     | -          |
| 77            | Primary            | Serous           | n.a.         | Yes                   | pT3c       |
| 91a           | Primary            | Serous           | n.a.         | -                     | -          |
