# Supplementary material for: Serum- and glucocorticoid- inducible kinase 2, SGK2, is a novel autophagy regulator and modulates platinum drugs response in cancer cells
Source: PubMed Central journal article supplement (PMC7529585; doi:10.1038/s41388-020-01433-6), 2020-08-27

Fig. S7 (related to Fig. 6)

a

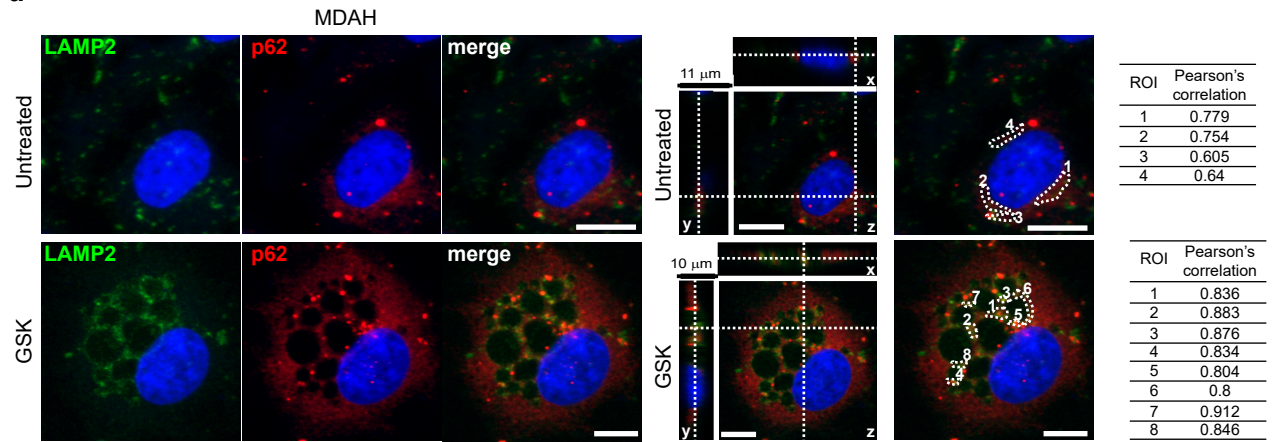

b

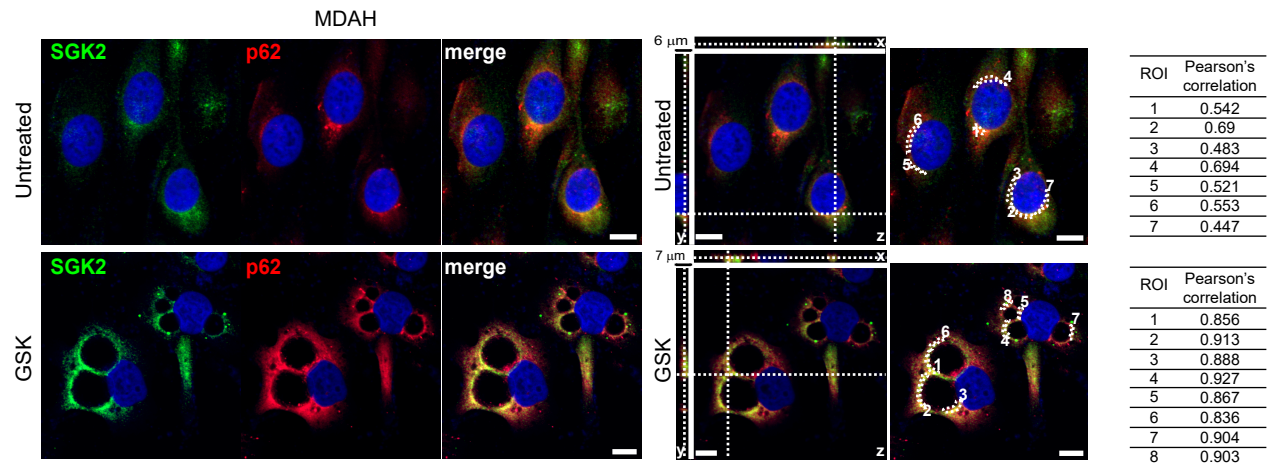

Supplement: 41388_2020_1433_MOESM10_ESM.pdf [file 41388_2020_1433_MOESM10_ESM.pdf]
