# Supplementary material for: Serum- and glucocorticoid- inducible kinase 2, SGK2, is a novel autophagy regulator and modulates platinum drugs response in cancer cells
Source: PubMed Central journal article supplement (PMC7529585; doi:10.1038/s41388-020-01433-6), 2020-08-27

**Fig. S8 (related to Fig. 7)**

**a**

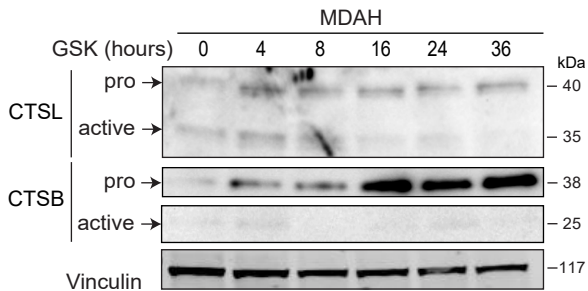

**b**

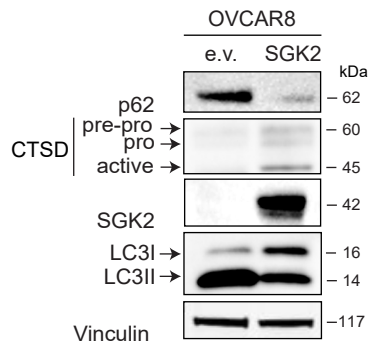

**c**

| V-ATPase subunit | Predicted phosphorylation sites for SGK2 | Kinase Predictor V2 Score |
|------------------|------------------------------------------|---------------------------|
| ATP6V1H          | S174                                     | 250                       |
|                  | S180                                     | 345                       |
|                  | S190                                     | 287                       |
|                  | S192                                     | 252                       |
|                  | S194                                     | 295                       |
|                  | S351                                     | 332                       |
|                  | S354                                     | 274                       |
| ATP6V0A3         | S279                                     | 430                       |
|                  | T360                                     | 136                       |
|                  | S370                                     | 294                       |
|                  | S470                                     | 515                       |
|                  | S532                                     | 402                       |
|                  | S621                                     | 298                       |

**d**

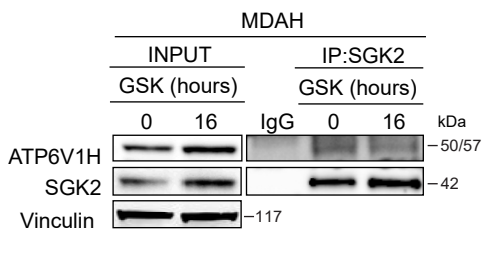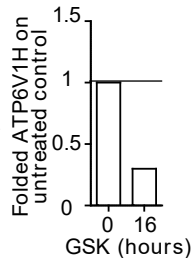

**e**

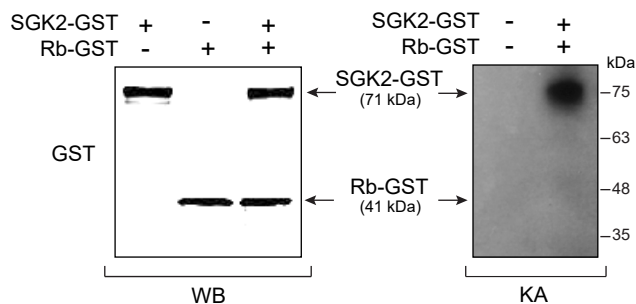

Supplement: 41388_2020_1433_MOESM11_ESM.pdf [file 41388_2020_1433_MOESM11_ESM.pdf]
