# Supplementary material for: Serum- and glucocorticoid- inducible kinase 2, SGK2, is a novel autophagy regulator and modulates platinum drugs response in cancer cells
Source: PubMed Central journal article supplement (PMC7529585; doi:10.1038/s41388-020-01433-6), 2020-08-27
Supplement: 41388_2020_1433_MOESM14_ESM.pdf [file 41388_2020_1433_MOESM14_ESM.pdf]

**Fig. S11 (related to Fig. 8)**

**a**

**SGK2 expression in Yoshihara Ovarian (53)**

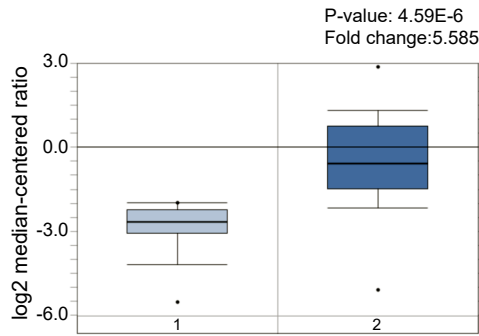

1. Peritoneum (10)
2. Ovarian Serous Adenocarcinoma (42)

**b**

**SGK2 expression in Hendrix Ovarian (103)**

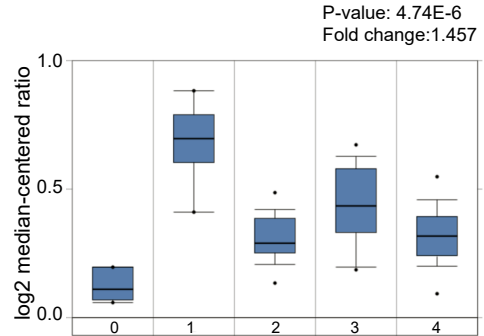

0. Ovary (4)
1. Ovarian Clear Cell Adenocarcinoma (8)
2. Ovarian Endometrioid Adenocarcinoma (37)
3. Ovarian Mucinous Adenocarcinoma (13)
4. Ovarian Serous Adenocarcinoma (41)

**c**

**SGK2 expression in TCGA Ovarian 2 (1168)**

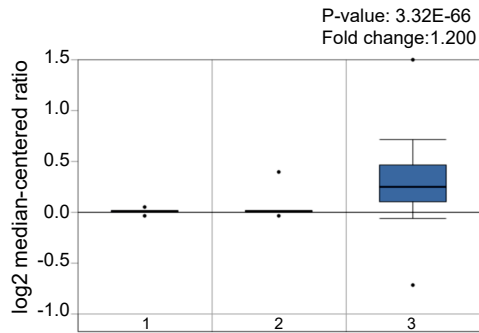

1. Blood (431)
2. Ovary (130)
3. Ovarian Serous Cystadenocarcinoma (607)
